# Supplementary material for: Cinnamomum japonicum Siebold Branch Extracts Attenuate NO and ROS Production via the Inhibition of p38 and JNK Phosphorylation
Source: MDPI journal article supplement (doi:10.3390/molecules28041974), 2023-02-19
Supplement: s1 [file s1]

## Supplementary Materials. Quantitative analysis of polyphenols using HPLC MS/MS

Table S1. The conditions of HPLC MS/MS

|          |               | Negative                                                                                        | Positive                                                                                      |
|----------|---------------|-------------------------------------------------------------------------------------------------|-----------------------------------------------------------------------------------------------|
| Standard |               | Epigallocatechin gallate, p-Coumaric acid, Quercetin                                            | Epicatechin, t-Cinnamic acid, Coumarin, Cinnamylaldehyde, Eugenol                             |
| MS       | Condition     | Turbo Ion Spray, temperature 500 °C, MRM scan type spray voltage -4500V, CG 20, GS1 50, GS2 50. | Turbo Ion Spray, temperature 500 °C, Spray voltage 5500V, CG 20, GS1 50, GS2 50               |
| LC       | Column        | Gemini 3 $\mu$ m, C18 110A 50 mm*2.0 mm<br>Gemini C18(4.0 mm $\times$ 2.0 mm) guard cartridge   | Gemini 3 $\mu$ m, C18 110A 50 mm*2.0 mm<br>Gemini C18(4.0 mm $\times$ 2.0 mm) guard cartridge |
|          | Temperature   | 40 °C                                                                                           | 40 °C                                                                                         |
|          | Autosampler   | 15 °C                                                                                           | 15 °C                                                                                         |
|          | Gradient time | 10% B start, 0.5min-40% B, 1.0min-85% B, 3min-85% B, 3.1min-10% B, 6min stop                    | 10% B start, 0.5min-40% B, 1.0min-85% B, 3min-85% B, 3.1min-10% B, 6min stop                  |
|          | Flow rate     | 0.3 mL/min                                                                                      | 0.3 mL/min                                                                                    |

Table S2. The contents of polyphenols of the extracts

| No. | Standard                 | Calculated Concentration CJB3 ( $\mu$ g/g) |
|-----|--------------------------|--------------------------------------------|
| 1   | Epigallocatechin gallate | 3.13                                       |
| 2   | Epicatechin              | 0.48                                       |
| 3   | p-Coumaric acid          | 31.11                                      |
| 4   | Coumarin                 | 0.02                                       |
| 5   | Cinnamyl acetate         | -                                          |
| 6   | Cinnamyl alcohol         | -                                          |
| 7   | trans-Cinnamic acid      | 3.96                                       |
| 8   | Cinnamyl aldehyde        | -                                          |
| 9   | Eugenol                  | 0.40                                       |
| 10  | Quercetin                | 98.82                                      |
|     | Total                    | 137.92                                     |
